# Supplementary material for: Rickettsia typhi Possesses Phospholipase A2 Enzymes that Are Involved in Infection of Host Cells
Source: PubMed Central journal article supplement (PMC3688537; doi:10.1371/journal.ppat.1003399), 2013-06-20

Figure S3

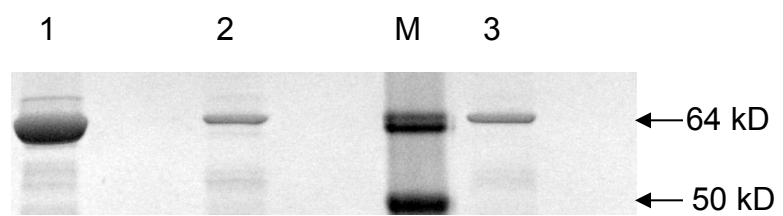

Supplement: ppat.1003399.s003.pdf [file ppat.1003399.s003.pdf]
