# Supplementary material for: Rickettsia typhi Possesses Phospholipase A2 Enzymes that Are Involved in Infection of Host Cells
Source: PubMed Central journal article supplement (PMC3688537; doi:10.1371/journal.ppat.1003399), 2013-06-20
Supplement: ppat.1003399.s004.pdf [file ppat.1003399.s004.pdf]

**Table S1. NCBI and PATRIC accession numbers for *Rickettsia* Pat1 and Pat2 sequences.****Pat1 sequences**

| <b>Taxon</b>                                                     | <b>NCBI</b>                  | <b>PATRIC</b>                                |
|------------------------------------------------------------------|------------------------------|----------------------------------------------|
| <i>Rickettsia bellii</i> RML369-C                                | YP_538013<br>YP_538012       | VBIRicBel102610_0959<br>VBIRicBel102610_0958 |
| <i>Rickettsia bellii</i> OSU 85-389                              | YP_001495950                 | VBIRicBel35792_0564                          |
| <i>Rickettsia canadensis</i> McKiel                              | YP_001492093                 | VBIRicCan89738_0393                          |
| <i>Rickettsia canadensis</i> CA410                               | YP_005299400                 | VBIRicCan238964_0359                         |
| <i>Rickettsia helvetica</i> C9P9                                 |                              | VBIRicHel217856_0676                         |
| <i>Rickettsia felis</i> URRWXCal2<br>pRF                         | YP_246376<br>YP_247427       | VBIRicFel64634_0421<br>VBIRicFel64634_1695   |
| <i>Rickettsia australis</i> Cutlack                              | YP_005414840                 | VBIRicAus231019_0707                         |
| <i>Rickettsia akari</i> Hartford                                 | YP_001493712                 | VBIRicAka50705_0974                          |
| <i>Rickettsia typhi</i> Wilmington                               | YP_067537                    | VBIRicTyp34752_0611                          |
| <i>Rickettsia prowazekii</i> GvV257                              | YP_005405102                 | VBIRicPro231244_0891                         |
| <i>Rickettsia prowazekii</i> Madrid E                            | NP_220970                    | VBIRicPro72556_0620                          |
| <i>Rickettsia</i> endosymbiont of <i>Ixodes scapularis</i>       | ZP_04699958                  | VBIRicEnd40569_1815                          |
| <i>Candidatus</i> <i>Rickettsia amblyommii</i> GAT-30V<br>pMCE_1 | YP_005365687<br>YP_005353138 |                                              |
| <i>Rickettsia rhipicephali</i> 3-7-female6-CWPP                  | YP_005390723                 | VBIRicRhi233851_1199                         |
| <i>Rickettsia massiliae</i> MTU5                                 | YP_001499568                 | VBIRicMas83254_1188                          |
| <i>Rickettsia massiliae</i> AZT80                                | YP_005301963                 | VBIRicMas238520_0724                         |
| <i>Rickettsia montanensis</i> OSU 85-930                         | YP_005391357                 | VBIRicMon232555_0371                         |
| <i>Rickettsia japonica</i> YH                                    | YP_004885050                 | VBIRicJap83739_1100                          |
| <i>Rickettsia heilongjiangensis</i> 054                          | YP_004764600                 | VBIRicHei193551_1060                         |
| <i>Rickettsia slovaca</i> 13-B                                   | YP_005066035                 | VBIRicSlo180092_1103                         |
| <i>Rickettsia conorii</i> subsp. <i>indica</i> ITTR              |                              | VBIRicCon229600_1196                         |
| <i>Rickettsia conorii</i> Malish 7                               | NP_360559                    | VBIRicCon45613_1049                          |
| <i>Rickettsia parkeri</i> Portsmouth                             | YP_005393160                 | VBIRicPar233447_1088                         |
| <i>Rickettsia africae</i> ESF-5                                  | YP_002845446                 | VBIRicAfr6986_1031                           |
| <i>Rickettsia sibirica</i> subsp. <i>mongolitimonae</i> HA-91    |                              | VBIRicSib225156_1146                         |

| <b>Taxon</b>                              | <b>NCBI</b>  | <b>PATRIC</b>                              |
|-------------------------------------------|--------------|--------------------------------------------|
| <i>Rickettsia sibirica</i> 246            | ZP_00142926  | VBIRicSib27963_1309                        |
| <i>Rickettsia peacockii</i> Rustic        | YP_002916515 | VBIRicPea48268_0721<br>VBIRicPea48268_0720 |
| <i>Rickettsia philipii</i> 364D           | YP_005301006 | VBIRicPhi124131_1077                       |
| <i>Rickettsia rickettsii</i> Hlp#2        | YP_005295628 | VBIRicRic236174_1074                       |
| <i>Rickettsia rickettsii</i> Sheila Smith | YP_001495020 | VBIRicRic5337_1062                         |

### **Pat2 sequences**

| <b>Taxon</b>                                    | <b>NCBI</b>  | <b>PATRIC</b>        |
|-------------------------------------------------|--------------|----------------------|
| <i>Rickettsia bellii</i> RML369-C               | YP_538517    | VBIRicBel102610_1347 |
| <i>Rickettsia bellii</i> OSU 85-389             | YP_001495691 | VBIRicBel35792_0274  |
| <i>Rickettsia helvetica</i> C9P9                |              | VBIRicHel217856_0986 |
| <i>Rickettsia typhi</i> Wilmington              | YP_067473    | VBIRicTyp34752_0547  |
| <i>Rickettsia prowazekii</i> GvV257             | YP_005413959 | VBIRicPro237744_0530 |
| <i>Rickettsia prowazekii</i> Madrid E           | NP_220907    | VBIRicPro72556_0544  |
| <i>Candidatus Rickettsia amblyommii</i> GAT-30V | YP_005365402 |                      |
| <i>Rickettsia rhipicephali</i> 3-7-female6-CWPP | YP_005390510 | VBIRicRhi233851_0919 |
| <i>Rickettsia massiliae</i> MTU5                | YP_001499395 | VBIRicMas83254_0848  |
| <i>Rickettsia massiliae</i> AZT80               | YP_005302159 | VBIRicMas238520_0975 |
| <i>Rickettsia montanensis</i> OSU 85-930        | YP_005391134 | VBIRicMon232555_0111 |
